# Supplementary material
Source: Springer Nature journal article supplement (https://www.springermedizin.de/resource/supplementary/12875_2014_1116_MOESM2_ESM.pdf/9435850)
Supplement: MOESM2 [file 9435850]

**List of ATC codes for identifying painkillers**

| <b>ATC codes</b> |
|------------------|
| D04AB            |
| M01AE            |
| N02A             |
| N02BE            |
| R02AD            |
| S01H             |
